# Supplementary material for: Fe3S4 nanoparticles wrapped in a g-C3N4 matrix: an outstanding visible active Fenton catalysis and electrochemical sensing platform for lead and uranyl ions
Source: Royal Society of Chemistry journal article supplement (doi:10.1039/d2nj04933c), 2022-12-07
Supplement: d2nj04933c1.pdf [file d2nj04933c1.pdf]

## **Supporting Information**

### **Fe<sub>3</sub>S<sub>4</sub> nanoparticles wrapped in g-C<sub>3</sub>N<sub>4</sub> matrix: an outstanding visible active Fenton catalysis and electrochemical sensing platform for Lead and Uranyl ions**

Arshid Bashir<sup>1,2</sup>, Altaf Hussain Pandith<sup>1\*</sup>, Aaliya Qureashi<sup>1</sup>, Lateef Ahmad Malik<sup>1</sup>

*<sup>1</sup>Laboratory of Nanoscience and Quantum computations, Department of Chemistry, University of Kashmir, India*

*<sup>2</sup> School Education Department, Jammu and Kashmir, India*

**Table S1**

| Experiment No. | Mass of g-C <sub>3</sub> N <sub>4</sub> (mg) | Weight of Fe <sub>3</sub> S <sub>4</sub> (mg) | Weight of thiourea (mg) | Volume of the solution (mL) | Percent MB degradation efficiency * |
|----------------|----------------------------------------------|-----------------------------------------------|-------------------------|-----------------------------|-------------------------------------|
| 1              | 50                                           | 540                                           | 300                     | 150                         | 87                                  |
| <b>2</b>       | <b>100</b>                                   | <b>540</b>                                    | <b>300</b>              | <b>150</b>                  | <b>99</b>                           |
| 3              | 150                                          | 540                                           | 300                     | 200                         | 92                                  |
| 4              | 200                                          | 540                                           | 300                     | 300                         | 85                                  |
| 5              | 100                                          | 250                                           | 300                     | 150                         | 77                                  |
| 6              | 100                                          | 400                                           | 300                     | 150                         | 91                                  |
| 7              | 100                                          | 700                                           | 300                     | 150                         | >99                                 |

\* At optimum pH=6.0 and concentration of H<sub>2</sub>O<sub>2</sub>=3mM, volume ratio of ethylene glycol and water =2:1

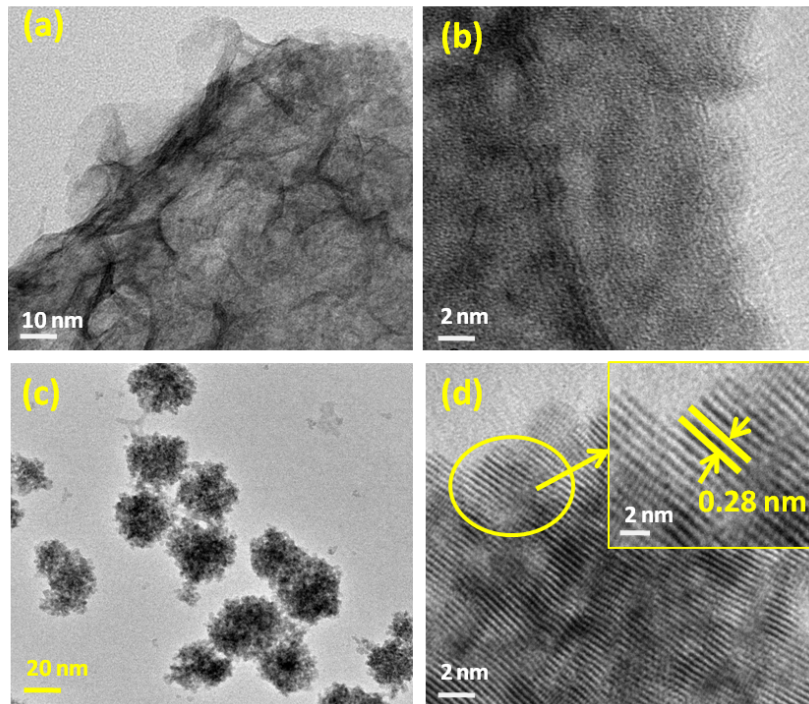

**Fig.S1** TEM micrographs of g-C<sub>3</sub>N<sub>4</sub>(a,b); TEM micrograph of Fe<sub>3</sub>S<sub>4</sub>; (c) TEM micrograph of Fe<sub>3</sub>S<sub>4</sub>(d).

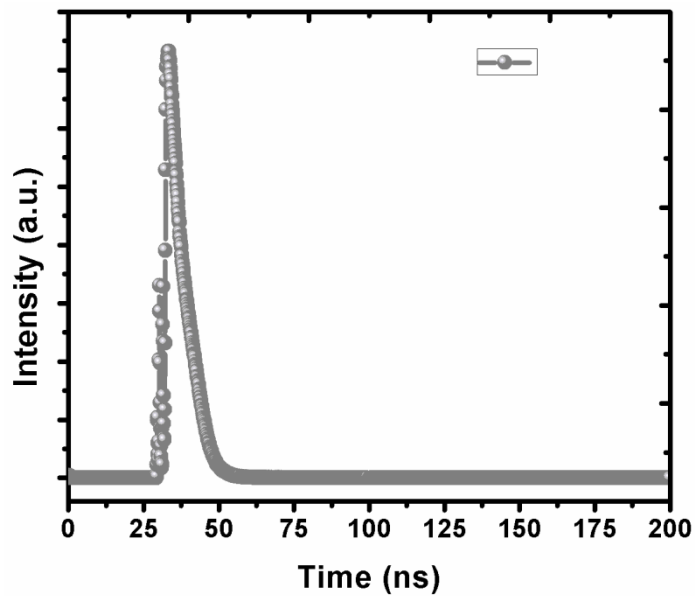

**Fig. S2** Transient photoluminescence spectrum of the  $\text{Fe}_3\text{S}_4\text{-g-C}_3\text{N}_4$

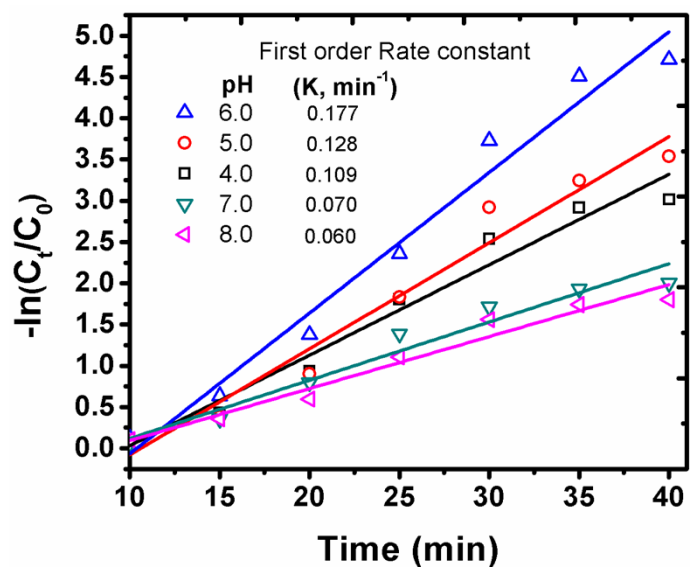

**Fig. S3** Pseudo-first order kinetic plots for the photo-Fenton degradation of methylene blue dye at different pH values.

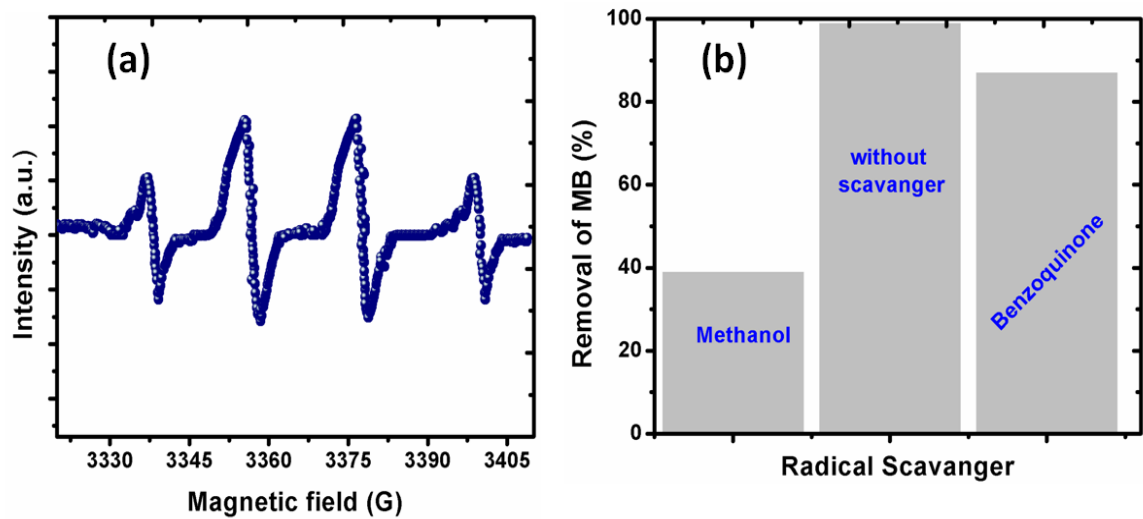

**Fig.S4** (a)ESR spectra of  $\text{Fe}_3\text{S}_4\text{-g-C}_3\text{N}_4\text{-H}_2\text{O}_2\text{-sunlight}$  using DMPO-OH (b) Effect of methanol and benzoquinone scavenger on the rate of photo-Fenton degradation of methylene blue dye

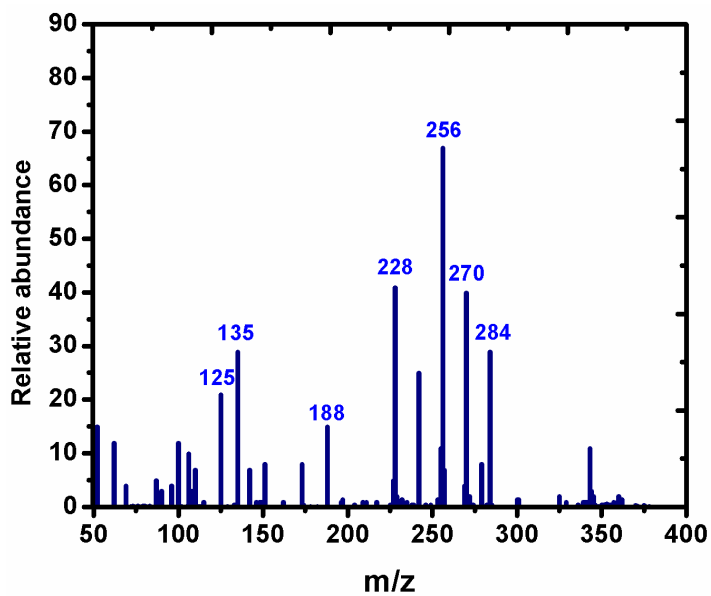

**Fig. S5** LC-MS spectra of reaction mixture showing mineralization of methylene blue dye

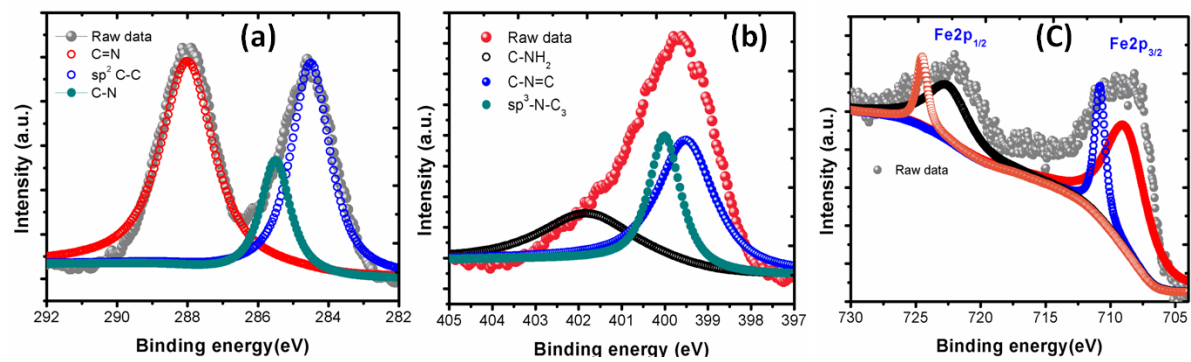

**Fig.S6** High-resolution XPS scan after reductive-adsorption of hexavalent uranium (a) C1s (b) N1s(c) Fe2p
